# Supplementary material for: The Executive Functioning Paradox in Substance Use Disorders
Source: MDPI journal article supplement (doi:10.3390/biomedicines10112728), 2022-10-28
Supplement: s1 [file s1]

Table S1. Description of the 512 Regions of Interest as described by Yeo Dictionary Atlas.

| Component | Difumo_names                                      | Yeo_networks17   | GM          | WM          | CSF         |
|-----------|---------------------------------------------------|------------------|-------------|-------------|-------------|
| 1         | Superior occipital sulcus inferior LH             | DorsAttnA        | 0.575880204 | 0.346929161 | 0.077030615 |
| 2         | Superior occipital gyrus                          | VisCent          | 0.472506536 | 0.495570263 | 0.031931908 |
| 3         | Insula antero-inferior                            | SalVentAttnA     | 0.720733158 | 0.054171999 | 0.225070424 |
| 4         | Middle frontal gyrus middle RH                    | SalVentAttnB     | 0.64341873  | 0.245515795 | 0.06801427  |
| 5         | Calcarine cortex posterior LH                     | VisCent          | 0.553855658 | 0.414815055 | 0.031008928 |
| 6         | Lateral fissure posterior ramus RH                | SalVentAttnA     | 0.452173118 | 0.511383637 | 0.036402382 |
| 7         | Superior occipital gyrus superior LH              | DorsAttnA        | 0.306230862 | 0.648622337 | 0.044662029 |
| 8         | Angular gyrus inferior LH                         | TempPar          | 0.727386807 | 0.199754034 | 0.072504452 |
| 9         | Calcarine sulcus anterior LH                      | VisPeri          | 0.622813828 | 0.325256655 | 0.051944418 |
| 10        | Frontal pole inferior RH                          | ContB            | 0.661148398 | 0.194421023 | 0.095687053 |
| 11        | Midbrain superior                                 | No network found | 0.671035561 | 0.159968349 | 0.166200084 |
| 12        | Occipitotemporal gyrus mid-posterior RH           | DorsAttnA        | 0.722065697 | 0.236968357 | 0.040886573 |
| 13        | Insula postero-inferior medial                    | SomMotB          | 0.668649838 | 0.307668693 | 0.023684975 |
| 14        | Cerebellum VI RH                                  | No network found | 0.596015348 | 0.396682033 | 0.007307209 |
| 15        | Fusiform gyrus anterior LH                        | DorsAttnA        | 0.830749839 | 0.059461896 | 0.109786969 |
| 16        | Cerebellum Crus I anterior RH                     | No network found | 0.59737708  | 0.370113979 | 0.030346592 |
| 17        | Supramarginal gyrus antero-superior LH            | DorsAttnB        | 0.494749561 | 0.457885497 | 0.045460359 |
| 18        | Angular sulcus superior LH                        | DefaultB         | 0.559949202 | 0.39108251  | 0.040272585 |
| 19        | Paracingulate sulcus LH                           | SalVentAttnB     | 0.45623692  | 0.520651682 | 0.023111699 |
| 20        | Superior frontal gyrus superior                   | SomMotA          | 0.592332496 | 0.283522638 | 0.103399448 |
| 21        | Pars triangularis LH                              | DefaultB         | 0.655862037 | 0.07753695  | 0.139295998 |
| 22        | Superior longitudinal fasciculus II LH            | No network found | 0.032083448 | 0.967199838 | 0.000715201 |
| 23        | Corona radiata antero-superior                    | No network found | 0.0195889   | 0.979745385 | 0.000686319 |
| 24        | Dorsomedial prefrontal cortex antero-superior LH  | DefaultB         | 0.640048273 | 0.229680642 | 0.105655437 |
| 25        | Superior longitudinal fasciculus III anterior LH  | No network found | 0.042096041 | 0.957843369 | 4.96042E-05 |
| 26        | Cuneus antero-inferior                            | VisPeri          | 0.611854399 | 0.288172329 | 0.099982467 |
| 27        | Anterior vertical ramus of the lateral fissure LH | DefaultB         | 0.66349062  | 0.261661676 | 0.073778579 |
| 28        | Corpus callosum isthmus anterior                  | No network found | 0.193872689 | 0.421464625 | 0.384676341 |
| 29        | Internal capsule posterior limb RH                | No network found | 0.247868556 | 0.749999699 | 0.002128016 |
| 30        | Cingulate gyrus middle inferior                   | ContC            | 0.613005096 | 0.29075291  | 0.096239725 |
| 31        | Caudate RH                                        | No network found | 0.578796166 | 0.409584503 | 0.01163335  |
| 32        | Superior frontal sulcus anterior RH               | ContB            | 0.468779704 | 0.496426923 | 0.03359863  |
| 33        | Pars orbitalis RH                                 | DefaultB         | 0.655764398 | 0.275065854 | 0.05382516  |

Table S1. Description of the 512 Regions of Interest as described by Yeo Dictionary Atlas.

|    |                                                                                            |                  |             |             |             |
|----|--------------------------------------------------------------------------------------------|------------------|-------------|-------------|-------------|
| 34 | Cerebellum VIIb                                                                            | No network found | 0.781835485 | 0.114307576 | 0.098836578 |
| 35 | Intraparietal sulcus anterior LH                                                           | DorsAttnB        | 0.560249094 | 0.152479695 | 0.211712088 |
| 36 | Superior longitudinal fasciculus I posterior RH                                            | No network found | 0.030552203 | 0.969327053 | 0.00012589  |
| 37 | Superior longitudinal fasciculus II middle RH                                              | No network found | 0.0181254   | 0.981858052 | 1.35373E-05 |
| 38 | Angular gyrus postero-inferior RH                                                          | DefaultC         | 0.716772083 | 0.208349471 | 0.07477112  |
| 39 | Cerebrospinal fluid (between middle frontal gyrus and skull)                               | DefaultB         | 0.401517489 | 0.016921212 | 0.114356378 |
| 40 | Cerebellum III anterior                                                                    | DefaultC         | 0.498736098 | 0.132502712 | 0.313075873 |
| 41 | Central sulcus middle RH                                                                   | SomMotA          | 0.509983045 | 0.346122125 | 0.142123435 |
| 42 | Cerebrospinal fluid (between interhemispheric fissure and superior frontal gyrus superio ) | SalVentAttnA     | 0.44398159  | 0.034462534 | 0.218732307 |
| 43 | Superior frontal gyrus superior RH                                                         | DefaultB         | 0.659105575 | 0.268342523 | 0.061915794 |
| 44 | Frontal pole superior RH                                                                   | DefaultA         | 0.529705764 | 0.091767189 | 0.095294293 |
| 45 | Postcentral sulcus LH                                                                      | DorsAttnB        | 0.655613935 | 0.253170918 | 0.091178842 |
| 46 | Frontomarginal gyrus                                                                       | DefaultA         | 0.449605314 | 0.514653437 | 0.032644029 |
| 47 | Paracingulate sulcus posterior RH                                                          | SalVentAttnA     | 0.625352025 | 0.157670598 | 0.216721369 |
| 48 | Middle frontal gyrus mid-anterior LH                                                       | SalVentAttnB     | 0.635662245 | 0.144922237 | 0.09563041  |
| 49 | Middle frontal gyrus posterior lateral RH                                                  | ContB            | 0.565873584 | 0.223992114 | 0.105685969 |
| 50 | Intraparietal sulcus superior LH                                                           | ContB            | 0.473332146 | 0.077996236 | 0.223384856 |
| 51 | Ventromedial prefrontal cortex                                                             | DefaultA         | 0.736777448 | 0.122046733 | 0.141181985 |
| 52 | Lingual gyrus posterior                                                                    | VisCent          | 0.686312324 | 0.143436391 | 0.149460501 |
| 53 | Insula antero-superior RH                                                                  | SalVentAttnA     | 0.780743556 | 0.089289092 | 0.129465669 |
| 54 | Caudate superior                                                                           | No network found | 0.260873519 | 0.684551548 | 0.054563936 |
| 55 | Parieto-occipital sulcus mid-posterior                                                     | ContC            | 0.517021905 | 0.411413131 | 0.071522748 |
| 56 | Globus pallidus anterior                                                                   | SalVentAttnB     | 0.487870074 | 0.511397716 | 0.000732913 |
| 57 | Superior longitudinal fasciculus I anterior LH                                             | No network found | 0.043086854 | 0.956668649 | 0.000252436 |
| 58 | Superior longitudinal fasciculus I anterior RH                                             | No network found | 0.025692012 | 0.974205724 | 9.74513E-05 |
| 59 | Precentral sulcus mid-inferior LH                                                          | ContA            | 0.660247763 | 0.263557722 | 0.075350134 |
| 60 | Cerebellum VI superior medial                                                              | No network found | 0.821612746 | 0.020712592 | 0.152959677 |
| 61 | Postcentral sulcus inferior RH                                                             | DorsAttnB        | 0.329287471 | 0.653727224 | 0.016968066 |
| 62 | Cuneus middle posterior RH                                                                 | VisPeri          | 0.479114605 | 0.456160883 | 0.062404866 |
| 63 | Cerebrospinal fluid (between middle frontal gyrus superior and skull LH)                   | ContB            | 0.53926698  | 0.048796793 | 0.14361224  |
| 64 | Paracingulate gyrus posterior LH                                                           | SomMotA          | 0.633962149 | 0.24117342  | 0.124873363 |
| 65 | Precentral gyrus mid-superior                                                              | DorsAttnB        | 0.464979086 | 0.080382549 | 0.193265162 |
| 66 | Superior temporal gyrus mid-anterior LH                                                    | TempPar          | 0.797321851 | 0.08963793  | 0.108515935 |
| 67 | Fusiform gyrus anterior                                                                    | DefaultC         | 0.788815609 | 0.144645125 | 0.066550641 |

Table S1. Description of the 512 Regions of Interest as described by Yeo Dictionary Atlas.

|                                                                      |                  |             |             |             |
|----------------------------------------------------------------------|------------------|-------------|-------------|-------------|
| 68 Superior frontal gyrus medial anterior                            | DefaultA         | 0.666300246 | 0.09669621  | 0.229399291 |
| 69 Superior frontal gyrus mid-posterior                              | SalVentAttnB     | 0.537307017 | 0.412071667 | 0.045577386 |
| 70 Cerebellum IX                                                     | No network found | 0.723533867 | 0.188568602 | 0.087908178 |
| 71 Thalamus posterior                                                | No network found | 0.736321993 | 0.259094426 | 0.004576953 |
| 72 Globus pallidus RH                                                | No network found | 0.161074743 | 0.838355039 | 0.000577517 |
| 73 Postcentral sulcus RH                                             | SomMotA          | 0.462255553 | 0.464206743 | 0.071026019 |
| 74 Thalamus superior                                                 | No network found | 0.525033424 | 0.474915902 | 6.08077E-05 |
| 75 Superior occipital sulcus superior LH                             | DorsAttnA        | 0.537839875 | 0.320162757 | 0.133609391 |
| 76 Supramarginal gyrus posterior LH                                  | SalVentAttnB     | 0.622492608 | 0.225945156 | 0.087835167 |
| 77 Gyrus rectus                                                      | LimbicB          | 0.580008258 | 0.297691083 | 0.122012854 |
| 78 Anterior occipital sulcus RH                                      | VisCent          | 0.636495914 | 0.328158656 | 0.035159848 |
| 79 Lateral fissure anterior                                          | TempPar          | 0.567162503 | 0.02014067  | 0.346891757 |
| 80 Corona radiata posterior LH                                       | No network found | 0.016688985 | 0.983266103 | 3.05328E-05 |
| 81 Cerebellum V anterior                                             | DefaultC         | 0.840033957 | 0.011744873 | 0.148230107 |
| 82 Parieto-occipital sulcus mid-anterior                             | DefaultC         | 0.775895562 | 0.121462843 | 0.102652391 |
| 83 Hippocampus anterior                                              | No network found | 0.749665284 | 0.130729133 | 0.119616404 |
| 84 Superior frontal gyrus mid-anterior LH                            | DefaultB         | 0.558752335 | 0.387134455 | 0.050689266 |
| 85 Cerebellum Crus II anterior LH                                    | No network found | 0.711262947 | 0.258648649 | 0.029549041 |
| 86 Intraparietal sulcus middle RH                                    | ContA            | 0.576446864 | 0.360686624 | 0.062805501 |
| 87 Parieto-occipital sulcus posterior lateral                        | VisPeri          | 0.405713396 | 0.543828741 | 0.04654605  |
| 88 Occipital pole LH                                                 | VisCent          | 0.489877413 | 0.433708557 | 0.059249044 |
| 89 Corticospinal tract superior                                      | No network found | 0.014549358 | 0.98544955  | 4.3066E-06  |
| 90 Cingulate gyrus middle superior                                   | SalVentAttnA     | 0.749980965 | 0.026498029 | 0.223525015 |
| 91 Parieto-occipital sulcus anterior                                 | DefaultC         | 0.611236435 | 0.354115638 | 0.034635665 |
| 92 Cerebrospinal fluid (between callosomarginal sulcus and skull LH) | DorsAttnB        | 0.460838872 | 0.086070558 | 0.254005733 |
| 93 Occipitotemporal gyrus posterior RH                               | DorsAttnA        | 0.625174391 | 0.347182662 | 0.02762415  |
| 94 Insula postero-superior lateral LH                                | SomMotB          | 0.721810919 | 0.214064469 | 0.064137628 |
| 95 Superior frontal gyrus posterior LH                               | DorsAttnB        | 0.582642877 | 0.171111177 | 0.180730983 |
| 96 Inferior frontal sulcus middle RH                                 | ContA            | 0.644326034 | 0.268616092 | 0.073188347 |
| 97 Postcentral gyrus middle LH                                       | SomMotA          | 0.536902878 | 0.193470988 | 0.170537405 |
| 98 Arcuate fasciculus postero-inferior LH                            | SomMotB          | 0.060460564 | 0.939039403 | 0.000507046 |
| 99 Angular gyrus anterior RH                                         | SalVentAttnB     | 0.620165076 | 0.20910885  | 0.088601139 |
| 100 Angular sulcus inferior RH                                       | DefaultA         | 0.529492583 | 0.429839955 | 0.039116299 |
| 101 Temporal pole LH                                                 | DefaultB         | 0.789354152 | 0.118720754 | 0.073152401 |

Table S1. Description of the 512 Regions of Interest as described by Yeo Dictionary Atlas.

|     |                                            |                  |             |             |             |
|-----|--------------------------------------------|------------------|-------------|-------------|-------------|
| 102 | Paracentral lobule inferior LH             | SomMotA          | 0.625314369 | 0.17076462  | 0.203931935 |
| 103 | Precentral sulcus medial                   | SomMotA          | 0.602816165 | 0.165753402 | 0.230163754 |
| 104 | Dorsomedial prefrontal cortex LH           | DefaultB         | 0.622845274 | 0.173266113 | 0.201657319 |
| 105 | Amygdala inferior                          | LimbicA          | 0.916411557 | 0.026621188 | 0.05682835  |
| 106 | Perirhinal cortex                          | LimbicA          | 0.607432396 | 0.354085466 | 0.03845772  |
| 107 | Cuneus middle                              | VisPeri          | 0.675588928 | 0.214946411 | 0.109466267 |
| 108 | Callosomarginal sulcus middle              | SomMotA          | 0.280221082 | 0.704689843 | 0.015093567 |
| 109 | Lunate sulcus RH                           | VisCent          | 0.473091866 | 0.492074191 | 0.034235565 |
| 110 | Putamen superior                           | No network found | 0.106487034 | 0.893506685 | 1.27836E-05 |
| 111 | Putamen LH                                 | No network found | 0.434488396 | 0.56548484  | 2.37514E-05 |
| 112 | Frontal pole                               | DefaultA         | 0.453391922 | 0.043064315 | 0.12413394  |
| 113 | Forceps minor                              | No network found | 0.004884799 | 0.99508163  | 2.95797E-05 |
| 114 | Superior temporal gyrus medial anterior    | LimbicA          | 0.624822516 | 0.039366128 | 0.333258964 |
| 115 | Middle frontal gyrus anterior RH           | SalVentAttnB     | 0.65848741  | 0.216017754 | 0.094186597 |
| 116 | Planum polare superior                     | SomMotB          | 0.644296995 | 0.02591727  | 0.329795644 |
| 117 | Dorsomedial prefrontal cortex posterior    | ContB            | 0.679837561 | 0.033259991 | 0.286467035 |
| 118 | Superior frontal gyrus postero-superior LH | SalVentAttnB     | 0.637763713 | 0.136018207 | 0.104922519 |
| 119 | Supramarginal gyrus postero-superior RH    | ContB            | 0.503873108 | 0.442755337 | 0.045479808 |
| 120 | Amygdala                                   | No network found | 0.768932801 | 0.09650655  | 0.134551895 |
| 121 | Cerebellum VI medial RH                    | No network found | 0.905453887 | 0.070978712 | 0.023569618 |
| 122 | Lingual gyrus medial                       | VisPeri          | 0.695510114 | 0.071360516 | 0.233127436 |
| 123 | Cuneus anterior RH                         | VisPeri          | 0.471080358 | 0.483247036 | 0.045675666 |
| 124 | Superior frontal sulcus middle LH          | DefaultA         | 0.622838102 | 0.269168554 | 0.106088002 |
| 125 | Cerebellum IX inferior                     | No network found | 0.576667993 | 0.359399909 | 0.063927542 |
| 126 | Cingulum anterior                          | SalVentAttnB     | 0.142103073 | 0.856511394 | 0.001386899 |
| 127 | Inferior temporal sulcus mid-posterior RH  | ContA            | 0.708457862 | 0.255125417 | 0.034891921 |
| 128 | Cerebellum VI superior LH                  | VisPeri          | 0.832012316 | 0.014243832 | 0.153622612 |
| 129 | Optic radiation LH                         | No network found | 0.041821495 | 0.958049539 | 0.000133167 |
| 130 | Corpus callosum genu inferior              | No network found | 0.319354966 | 0.423883713 | 0.256768459 |
| 131 | Precuneus mid-superior LH                  | ContC            | 0.612253926 | 0.279596225 | 0.107521593 |
| 132 | Postcentral gyrus mid-inferior             | SomMotB          | 0.598812665 | 0.22219784  | 0.102274194 |
| 133 | Inferior frontal sulcus posterior LH       | ContA            | 0.389846025 | 0.59368093  | 0.016384807 |
| 134 | Lateral occipital cortex posterior LH      | VisCent          | 0.64845787  | 0.157302443 | 0.140446602 |
| 135 | Angular gyrus mid-posterior RH             | DefaultA         | 0.616136032 | 0.321525635 | 0.050216796 |

Table S1. Description of the 512 Regions of Interest as described by Yeo Dictionary Atlas.

|     |                                                                   |                  |             |             |             |
|-----|-------------------------------------------------------------------|------------------|-------------|-------------|-------------|
| 136 | Temporal pole                                                     | LimbicA          | 0.724868017 | 0.227228791 | 0.04565789  |
| 137 | Cerebellum Crus II posterior LH                                   | No network found | 0.821402467 | 0.126152325 | 0.050394775 |
| 138 | Superior temporal sulcus posterior LH                             | DorsAttnA        | 0.390920887 | 0.59177487  | 0.0173013   |
| 139 | Cerebrospinal fluid (between superior precentral gyrus and skull) | SomMotA          | 0.484140425 | 0.328254311 | 0.128389609 |
| 140 | Lunate sulcus LH                                                  | VisCent          | 0.498083552 | 0.468896953 | 0.032781001 |
| 141 | Cerebellum Crus I medial RH                                       | No network found | 0.844054174 | 0.121607788 | 0.034089635 |
| 142 | Posterior cingulate cortex LH                                     | DefaultA         | 0.713457441 | 0.198045986 | 0.088497433 |
| 143 | Precuneus anterior                                                | SalVentAttnA     | 0.646250191 | 0.115127594 | 0.238635092 |
| 144 | Intraparietal sulcus middle LH                                    | ContA            | 0.560574819 | 0.313107365 | 0.125153881 |
| 145 | Lingual gyrus middle                                              | VisPeri          | 0.731645552 | 0.093001612 | 0.175354528 |
| 146 | Superior temporal gyrus posterior RH                              | TempPar          | 0.597701787 | 0.340359593 | 0.052556852 |
| 147 | Lateral orbital cortex                                            | DefaultB         | 0.803315379 | 0.124500344 | 0.060642483 |
| 148 | Pons antero-superior                                              | No network found | 0.41394441  | 0.310645208 | 0.167701098 |
| 149 | Middle frontal sulcus anterior                                    | SalVentAttnB     | 0.217757473 | 0.778380036 | 0.003871644 |
| 150 | Occipital pole superior LH                                        | VisCent          | 0.518282064 | 0.418566204 | 0.060133774 |
| 151 | Lingual gyrus mid-posterior LH                                    | VisCent          | 0.549069954 | 0.420691437 | 0.030235156 |
| 152 | Posterior cingulate cortex superior                               | ContC            | 0.74312399  | 0.097924279 | 0.158968303 |
| 153 | Inferior frontal sulcus posterior RH                              | ContA            | 0.63225108  | 0.30416415  | 0.063112487 |
| 154 | Cerebrospinal fluid (between angular gyrus and skull LH)          | DefaultA         | 0.518680193 | 0.03725501  | 0.18527621  |
| 155 | Intraparietal sulcus mid-anterior LH                              | ContA            | 0.515276947 | 0.440427281 | 0.044295404 |
| 156 | Arcuate fasciculus postero-inferior RH                            | TempPar          | 0.221291963 | 0.774072281 | 0.004627765 |
| 157 | Frontal pole lateral RH                                           | ContB            | 0.5524167   | 0.071978585 | 0.122404458 |
| 158 | Cerebellum VIIIb inferior                                         | No network found | 0.870803492 | 0.108935418 | 0.018819098 |
| 159 | Parieto-occipital sulcus middle superior LH                       | ContC            | 0.688996462 | 0.206042526 | 0.104944591 |
| 160 | Anterior rami of the lateral fissure RH                           | SalVentAttnB     | 0.640547453 | 0.27708404  | 0.08072159  |
| 161 | Cingulate gyrus mid-posterior                                     | SalVentAttnA     | 0.794944015 | 0.062322981 | 0.142738431 |
| 162 | Superior frontal sulcus posterior LH                              | ContA            | 0.574393658 | 0.358879796 | 0.065979253 |
| 163 | Superior longitudinal fasciculus I posterior LH                   | DorsAttnB        | 0.286586322 | 0.686925397 | 0.026468839 |
| 164 | Cerebellum IV inferior                                            | No network found | 0.695116647 | 0.274991159 | 0.029905629 |
| 165 | Corona radiata superior                                           | No network found | 0.010958004 | 0.989032777 | 1.00608E-05 |
| 166 | Insula postero-superior lateral                                   | SomMotB          | 0.771019483 | 0.033857556 | 0.195129309 |
| 167 | Middle frontal gyrus posterior LH                                 | DefaultB         | 0.597052186 | 0.31296777  | 0.078350635 |
| 168 | Third ventricle                                                   | No network found | 0.468140073 | 0.199944398 | 0.331917237 |
| 169 | Precentral gyrus middle LH                                        | DorsAttnB        | 0.510199511 | 0.432203025 | 0.052996151 |

Table S1. Description of the 512 Regions of Interest as described by Yeo Dictionary Atlas.

|     |                                                                           |                  |             |             |             |
|-----|---------------------------------------------------------------------------|------------------|-------------|-------------|-------------|
| 170 | Callosal sulcus posterior                                                 | ContC            | 0.539374035 | 0.383349775 | 0.077281115 |
| 171 | Angular gyrus superior LH                                                 | DefaultA         | 0.548672909 | 0.395622028 | 0.049236803 |
| 172 | Superior occipital gyrus LH                                               | DorsAttnA        | 0.621634283 | 0.242558572 | 0.123999109 |
| 173 | Superior longitudinal fasciculus II posterior RH                          | ContA            | 0.182129712 | 0.813457098 | 0.004411705 |
| 174 | Superior frontal gyrus anterior                                           | DefaultB         | 0.365141096 | 0.606505776 | 0.02773049  |
| 175 | Cuneus posterior RH                                                       | VisCent          | 0.394531074 | 0.577161309 | 0.028292586 |
| 176 | Superior parts of central and postcentral sulci                           | SomMotA          | 0.469438641 | 0.331313431 | 0.184870182 |
| 177 | Calcarine sulcus mid-anterior                                             | VisPeri          | 0.500559021 | 0.397775258 | 0.101659856 |
| 178 | Middle temporal gyrus medial LH                                           | SalVentAttnA     | 0.372035051 | 0.607886702 | 0.020071391 |
| 179 | Occipital pole lateral LH                                                 | VisCent          | 0.529379198 | 0.340603594 | 0.109710782 |
| 180 | Fusiform gyrus middle superior RH                                         | VisCent          | 0.55023375  | 0.421681304 | 0.028086024 |
| 181 | Cerebrospinal fluid (between superior parietal lobule and skull RH)       | DorsAttnB        | 0.341619188 | 0.071999056 | 0.15962381  |
| 182 | Cerebrospinal fluid (between superior frontal gyrus and skull)            | DefaultB         | 0.441650062 | 0.011121631 | 0.170268941 |
| 183 | Planum temporale                                                          | SomMotB          | 0.404318738 | 0.581293677 | 0.014397547 |
| 184 | Subcentral gyrus RH                                                       | SomMotB          | 0.615896012 | 0.116821247 | 0.116896325 |
| 185 | Middle frontal sulcus anterior LH                                         | SalVentAttnB     | 0.637435297 | 0.258905135 | 0.08247774  |
| 186 | Anterior cingulate cortex                                                 | DefaultA         | 0.740054665 | 0.109201072 | 0.150744499 |
| 187 | Inferior occipital gyrus                                                  | VisCent          | 0.775145989 | 0.130783075 | 0.080130211 |
| 188 | Cerebrospinal fluid (between superior frontal gyrus lateral RH and skull) | DefaultA         | 0.463938488 | 0.020683331 | 0.121532555 |
| 189 | Arcuate fasciculus postero-superior                                       | SalVentAttnA     | 0.424863731 | 0.544655549 | 0.03048302  |
| 190 | Superior frontal sulcus anterior LH                                       | SalVentAttnB     | 0.602736472 | 0.322443878 | 0.071926145 |
| 191 | Cingulum middle                                                           | SalVentAttnA     | 0.201127986 | 0.797623097 | 0.001266023 |
| 192 | Frontal pole medial                                                       | DefaultA         | 0.604873963 | 0.216889863 | 0.148100324 |
| 193 | Supramarginal gyrus inferior LH                                           | SalVentAttnA     | 0.662233686 | 0.166279255 | 0.104201017 |
| 194 | Cerebrospinal fluid (between superior cerebellum and limbic lobe)         | VisPeri          | 0.311548304 | 0.034641434 | 0.653821166 |
| 195 | Occipital pole                                                            | VisCent          | 0.519313931 | 0.365377044 | 0.083103455 |
| 196 | Angular gyrus anterior LH                                                 | SalVentAttnA     | 0.608750317 | 0.313876369 | 0.074317907 |
| 197 | Corpus callosum genu                                                      | DefaultA         | 0.386412793 | 0.584181497 | 0.029422965 |
| 198 | Cerebellum VI antero-inferior LH                                          | No network found | 0.625185348 | 0.275201418 | 0.081351968 |
| 199 | Precentral gyrus superior RH                                              | SomMotA          | 0.473325316 | 0.455738724 | 0.067106391 |
| 200 | Occipital pole superior                                                   | VisCent          | 0.534742719 | 0.2510474   | 0.143396792 |
| 201 | Precentral sulcus mid-superior LH                                         | DorsAttnB        | 0.560423349 | 0.398230295 | 0.041246958 |
| 202 | Superior occipito-frontal fasciculus middle                               | No network found | 0.377339926 | 0.450746236 | 0.171919022 |
| 203 | Middle frontal gyrus mid-posterior RH                                     | ContB            | 0.59118306  | 0.312574873 | 0.074815642 |

Table S1. Description of the 512 Regions of Interest as described by Yeo Dictionary Atlas.

|     |                                             |                  |             |             |             |
|-----|---------------------------------------------|------------------|-------------|-------------|-------------|
| 204 | Pons                                        | No network found | 0.505629223 | 0.494302088 | 5.69098E-05 |
| 205 | Middle frontal gyrus anterior lateral RH    | SalVentAttnB     | 0.630223317 | 0.312823069 | 0.048391195 |
| 206 | Postcentral sulcus superior RH              | DorsAttnB        | 0.545027976 | 0.372182163 | 0.082651428 |
| 207 | Superior temporal sulcus posterior RH       | TempPar          | 0.674758227 | 0.271988041 | 0.053133516 |
| 208 | Corpus callosum genu superior               | No network found | 0.194483987 | 0.480849206 | 0.324668485 |
| 209 | Fourth ventricle                            | No network found | 0.479753075 | 0.170565698 | 0.349684424 |
| 210 | Calcarine sulcus middle                     | No network found | 0.156489832 | 0.80232154  | 0.041188731 |
| 211 | Postcentral sulcus superior LH              | SomMotA          | 0.458510409 | 0.465266243 | 0.076051745 |
| 212 | Precentral gyrus superior LH                | DorsAttnB        | 0.457254876 | 0.481489922 | 0.058400841 |
| 213 | Precentral sulcus mid-superior RH           | DorsAttnB        | 0.505970598 | 0.455880612 | 0.036175894 |
| 214 | Intraparietal sulcus anterior RH            | ContA            | 0.620849635 | 0.178271975 | 0.183721515 |
| 215 | Superior temporal gyrus medial anterior RH  | SalVentAttnA     | 0.542585028 | 0.408834462 | 0.048575288 |
| 216 | Precuneus postero-inferior RH               | ContC            | 0.53820746  | 0.420305448 | 0.041492176 |
| 217 | Parieto-occipital sulcus postero-superior   | VisPeri          | 0.60072283  | 0.188189642 | 0.197963832 |
| 218 | Cerebellum III inferior                     | No network found | 0.781618546 | 0.176988511 | 0.041388109 |
| 219 | Superior parietal lobule medial RH          | DorsAttnA        | 0.423826172 | 0.503108215 | 0.06898357  |
| 220 | Anterior cingulate cortex superior          | SalVentAttnB     | 0.777142427 | 0.040976857 | 0.181873646 |
| 221 | Middle frontal gyrus postero-inferior LH    | ContA            | 0.57334564  | 0.358578283 | 0.066708608 |
| 222 | Inferior longitudinal fasciculus            | No network found | 0.035695782 | 0.96149895  | 0.002789433 |
| 223 | Cingulate sulcus middle                     | SalVentAttnB     | 0.725152466 | 0.127769975 | 0.147081697 |
| 224 | Subthalamic nuclei                          | No network found | 0.333150441 | 0.648127571 | 0.018712905 |
| 225 | Caudate inferior                            | No network found | 0.624429116 | 0.104595209 | 0.270988856 |
| 226 | Parietal operculum posterior RH             | SomMotB          | 0.754621264 | 0.129452342 | 0.1159365   |
| 227 | Collateral sulcus posterior RH              | VisCent          | 0.338968215 | 0.651709386 | 0.00932978  |
| 228 | Cuneus postero-superior                     | VisPeri          | 0.56748777  | 0.162756865 | 0.165526647 |
| 229 | Paracentral sulcus                          | SomMotA          | 0.252404884 | 0.738175251 | 0.009388093 |
| 230 | Middle temporal gyrus middle posterior LH   | DefaultB         | 0.625150988 | 0.343566425 | 0.029371858 |
| 231 | Inferior temporal sulcus posterior LH       | DorsAttnA        | 0.637512946 | 0.332299989 | 0.030155777 |
| 232 | Occipital pole lateral RH                   | VisCent          | 0.580627683 | 0.379916011 | 0.037452932 |
| 233 | Medulla oblongata                           | No network found | 0.525507912 | 0.398753242 | 0.043887778 |
| 234 | Cerebellum Crus II posterior                | No network found | 0.825446441 | 0.142349948 | 0.028856384 |
| 235 | Superior temporal sulcus middle-superior RH | TempPar          | 0.640539216 | 0.306527428 | 0.052754168 |
| 236 | Anterior limb of internal capsule           | No network found | 0.753061704 | 0.240068755 | 0.00686761  |
| 237 | Middle temporal gyrus mid-posterior RH      | TempPar          | 0.766923508 | 0.144863195 | 0.079338544 |

Table S1. Description of the 512 Regions of Interest as described by Yeo Dictionary Atlas.

|     |                                                                           |                  |             |             |             |
|-----|---------------------------------------------------------------------------|------------------|-------------|-------------|-------------|
| 238 | Lateral occipital cortex superior LH                                      | DefaultC         | 0.583192684 | 0.176887106 | 0.146919957 |
| 239 | Pars triangularis RH                                                      | DefaultB         | 0.597922121 | 0.153743625 | 0.108418502 |
| 240 | Cuneus superior                                                           | VisPeri          | 0.633900962 | 0.23650154  | 0.127770179 |
| 241 | Superior parietal lobule postero-inferior posterior                       | ContC            | 0.441589393 | 0.484346497 | 0.073319612 |
| 242 | Superior parietal sulcus LH                                               | DorsAttnA        | 0.466008601 | 0.444014065 | 0.085146092 |
| 243 | Middle temporal gyrus posterior LH                                        | DorsAttnB        | 0.681285925 | 0.095887092 | 0.149399749 |
| 244 | Precuneus antero-inferior                                                 | ContC            | 0.601903391 | 0.33930396  | 0.058801456 |
| 245 | Cerebrospinal fluid (between middle frontal gyrus posterior and skull RH) | ContB            | 0.524480819 | 0.053683107 | 0.149132816 |
| 246 | Superior occipital sulcus middle RH                                       | ContA            | 0.534883963 | 0.386168535 | 0.074577752 |
| 247 | Supramarginal gyrus anterior RH                                           | DorsAttnB        | 0.64451108  | 0.222755773 | 0.109897077 |
| 248 | Posterior cingulate cortex inferior                                       | DefaultA         | 0.76071988  | 0.073853354 | 0.165430988 |
| 249 | Lateral fissure anterior LH                                               | SalVentAttnB     | 0.768793825 | 0.035374383 | 0.192369148 |
| 250 | Retrosplenial cortex superior                                             | DefaultC         | 0.520055793 | 0.23754351  | 0.242385108 |
| 251 | Middle frontal gyrus mid-posterior LH                                     | DefaultB         | 0.564606543 | 0.359861499 | 0.062663221 |
| 252 | Superior temporal gyrus superior RH                                       | SomMotB          | 0.690753646 | 0.238337103 | 0.057367534 |
| 253 | Precuneus middle                                                          | ContC            | 0.693898664 | 0.101790138 | 0.204302635 |
| 254 | Subsplenial area                                                          | No network found | 0.343445459 | 0.093901596 | 0.562650257 |
| 255 | Inferior temporal sulcus posterior RH                                     | DorsAttnB        | 0.539322726 | 0.432393193 | 0.027853034 |
| 256 | Cingulum mid-anterior                                                     | SalVentAttnB     | 0.353252584 | 0.641246094 | 0.005511908 |
| 257 | Cerebellum VI antero-superior LH                                          | No network found | 0.847831307 | 0.098944449 | 0.052830688 |
| 258 | Superior parietal lobule LH                                               | DorsAttnB        | 0.502728145 | 0.277434145 | 0.189807222 |
| 259 | Cerebellum III superior                                                   | No network found | 0.501915807 | 0.044524499 | 0.453570397 |
| 260 | Cerebellum VI posterior                                                   | No network found | 0.856205297 | 0.083305409 | 0.059323385 |
| 261 | Caudate                                                                   | No network found | 0.617853621 | 0.081409434 | 0.300743811 |
| 262 | Parahippocampal gyrus anterior                                            | DefaultC         | 0.758536611 | 0.192115962 | 0.049361862 |
| 263 | Central operculum posterior RH                                            | SomMotB          | 0.63207677  | 0.322972516 | 0.044968601 |
| 264 | Middle temporal gyrus mid-anterior LH                                     | DefaultB         | 0.623726122 | 0.34647429  | 0.028554083 |
| 265 | Fusiform gyrus posterior RH                                               | VisCent          | 0.624506347 | 0.330741877 | 0.044733658 |
| 266 | Frontal operculum RH                                                      | SalVentAttnB     | 0.53090118  | 0.440455667 | 0.028634054 |
| 267 | Superior frontal gyrus middle LH                                          | DefaultB         | 0.625754483 | 0.311267135 | 0.052687445 |
| 268 | Middle temporal gyrus posterior RH                                        | DorsAttnA        | 0.651108644 | 0.297351179 | 0.050934159 |
| 269 | Precentral gyrus inferior LH                                              | SomMotB          | 0.577634235 | 0.3377177   | 0.069410266 |
| 270 | Hippocampus                                                               | DefaultC         | 0.573093573 | 0.144210556 | 0.275500568 |
| 271 | Paracingulate gyrus mid-anterior LH                                       | DefaultA         | 0.64849881  | 0.257834122 | 0.093657647 |



Table S1. Description of the 512 Regions of Interest as described by Yeo Dictionary Atlas.

|     |                                                                         |                  |             |             |             |
|-----|-------------------------------------------------------------------------|------------------|-------------|-------------|-------------|
| 272 | Cerebellum VIIIb medial                                                 | No network found | 0.659579993 | 0.293361251 | 0.047064221 |
| 273 | Central sulcus mid-superior RH                                          | SomMotA          | 0.365960016 | 0.607503408 | 0.026528893 |
| 274 | Cerebellum VIIIb anterior                                               | No network found | 0.824235076 | 0.155813441 | 0.017050911 |
| 275 | Cerebrospinal fluid (between superior frontal gyrus superior and skull) | SalVentAttnA     | 0.411655197 | 0.045348915 | 0.100928854 |
| 276 | Superior parietal lobule postero-superior LH                            | DorsAttnA        | 0.510139207 | 0.30264171  | 0.130880774 |
| 277 | Superior frontal sulcus mid-posterior RH                                | ContB            | 0.643296761 | 0.248079615 | 0.106559369 |
| 278 | Middle occipital sulcus LH                                              | VisCent          | 0.408194206 | 0.56844097  | 0.023103755 |
| 279 | Internal capsule posterior RH                                           | No network found | 0.198080197 | 0.676765371 | 0.12516548  |
| 280 | Occipitotemporal gyrus posterior LH                                     | VisCent          | 0.619977766 | 0.357541864 | 0.022458456 |
| 281 | Inferior occipital sulcus                                               | VisCent          | 0.46226561  | 0.522065473 | 0.015529912 |
| 282 | Middle frontal gyrus anterior LH                                        | SalVentAttnB     | 0.492912594 | 0.472996732 | 0.032747551 |
| 283 | Lateral occipital cortex antero-superior RH                             | DorsAttnA        | 0.701232549 | 0.22146905  | 0.073674791 |
| 284 | Cerebellum VI superior lateral                                          | VisCent          | 0.783960378 | 0.061951203 | 0.152941194 |
| 285 | Cerebral peduncles                                                      | No network found | 0.699195486 | 0.15872819  | 0.142079938 |
| 286 | Occipital pole inferior                                                 | VisCent          | 0.575457048 | 0.3236235   | 0.08003073  |
| 287 | Ventromedial prefrontal cortex LH                                       | DefaultA         | 0.650259377 | 0.220899957 | 0.128841435 |
| 288 | Calcarine sulcus anterior                                               | DefaultC         | 0.754724659 | 0.088834561 | 0.156451826 |
| 289 | Cerebellum Crus I posterior RH                                          | No network found | 0.833139876 | 0.111330248 | 0.051449972 |
| 290 | Precentral sulcus mid-inferior RH                                       | ContA            | 0.668325797 | 0.216221811 | 0.104288157 |
| 291 | Dorsomedial prefrontal cortex anterior                                  | DefaultB         | 0.661640034 | 0.13334417  | 0.20099571  |
| 292 | Inferior temporal sulcus middle RH                                      | ContB            | 0.473455514 | 0.510722468 | 0.015263413 |
| 293 | Heschl's gyrus LH                                                       | SomMotB          | 0.7391669   | 0.077014877 | 0.182796603 |
| 294 | Middle frontal gyrus posterior RH                                       | ContB            | 0.504717    | 0.432660754 | 0.055928485 |
| 295 | Parietal operculum LH                                                   | SomMotB          | 0.59559672  | 0.323582962 | 0.080834291 |
| 296 | Calcarine cortex mid-posterior LH                                       | VisPeri          | 0.642014159 | 0.268351546 | 0.089635298 |
| 297 | Postcentral sulcus superior                                             | SomMotA          | 0.425468707 | 0.450408469 | 0.114279432 |
| 298 | Thalamus middle                                                         | No network found | 0.728322953 | 0.248679761 | 0.022992915 |
| 299 | Superior frontal gyrus medial middle                                    | ContB            | 0.650530902 | 0.087948301 | 0.251155765 |
| 300 | Inferior frontal gyrus posterior LH                                     | ContA            | 0.629018289 | 0.294093671 | 0.072840769 |
| 301 | Parieto-occipital sulcus middle inferior LH                             | VisPeri          | 0.444641459 | 0.512286705 | 0.043035666 |
| 302 | Subparietal sulcus LH                                                   | DefaultA         | 0.618259356 | 0.320517485 | 0.061220754 |
| 303 | Internal capsule anterior limb RH                                       | No network found | 0.417167951 | 0.580305377 | 0.002523324 |
| 304 | Precuneus mid-posterior                                                 | ContC            | 0.634463187 | 0.230614303 | 0.134156413 |
| 305 | Angular gyrus superior RH                                               | ContB            | 0.513809282 | 0.436975522 | 0.046391394 |

Table S1. Description of the 512 Regions of Interest as described by Yeo Dictionary Atlas.

|     |                                                                 |                  |             |             |             |
|-----|-----------------------------------------------------------------|------------------|-------------|-------------|-------------|
| 306 | Central sulcus middle LH                                        | SomMotA          | 0.501734653 | 0.398001715 | 0.099642147 |
| 307 | Superior frontal sulcus middle                                  | DefaultA         | 0.533816483 | 0.427211871 | 0.038943837 |
| 308 | Globus pallidus                                                 | No network found | 0.244999381 | 0.754937401 | 8.10643E-05 |
| 309 | Central sulcus inferior RH                                      | SomMotB          | 0.523360626 | 0.406096989 | 0.067918873 |
| 310 | Middle frontal gyrus middle                                     | SalVentAttnB     | 0.687215356 | 0.221572784 | 0.076681116 |
| 311 | Cerebrospinal fluid (between supramarginal gyrus and skull LH)  | DorsAttnB        | 0.649202703 | 0.098359854 | 0.125452934 |
| 312 | Superior frontal gyrus middle RH                                | DefaultA         | 0.637942707 | 0.264647115 | 0.092756591 |
| 313 | Corticospinal tract middle RH                                   | No network found | 0.030880591 | 0.969078185 | 5.21276E-05 |
| 314 | Cingulate sulcus posterior RH                                   | SomMotA          | 0.674769738 | 0.258082319 | 0.067153248 |
| 315 | Lateral occipital cortex superior RH                            | DefaultC         | 0.659848276 | 0.28248753  | 0.055702343 |
| 316 | Putamen postero-inferior                                        | No network found | 0.631650614 | 0.354432198 | 0.013932491 |
| 317 | Cerebellum horizontal fissure medial                            | No network found | 0.794558156 | 0.103520563 | 0.082455245 |
| 318 | Superior parietal sulcus RH                                     | DorsAttnB        | 0.504635991 | 0.328893955 | 0.156828884 |
| 319 | Calcarine cortex anterior                                       | VisPeri          | 0.651357286 | 0.282331577 | 0.066325169 |
| 320 | Precentral sulcus superior                                      | SomMotA          | 0.44751205  | 0.51115564  | 0.040223644 |
| 321 | Cuneus posterior                                                | VisPeri          | 0.557901368 | 0.256836617 | 0.159048135 |
| 322 | Precentral sulcus inferior LH                                   | ContA            | 0.689394095 | 0.195500166 | 0.106255169 |
| 323 | Superior longitudinal fasciculus II posterior LH                | DorsAttnB        | 0.054186596 | 0.945334951 | 0.00048586  |
| 324 | Superior parietal lobule postero-superior RH                    | DorsAttnA        | 0.514127051 | 0.240074573 | 0.130278247 |
| 325 | Anterior horizontal ramus of the lateral fissure LH             | DefaultB         | 0.644702889 | 0.2269983   | 0.119669885 |
| 326 | Parieto-occipital sulcus mid-anterior RH                        | DefaultC         | 0.356604468 | 0.624090959 | 0.019309396 |
| 327 | Cingulate sulcus mid-anterior RH                                | SalVentAttnB     | 0.709585274 | 0.19347202  | 0.096951612 |
| 328 | Caudate LH                                                      | No network found | 0.663850303 | 0.32752144  | 0.008625617 |
| 329 | Orbital H-shaped sulcus                                         | LimbicB          | 0.430101458 | 0.549735836 | 0.019159055 |
| 330 | Central operculum LH                                            | SalVentAttnA     | 0.724682334 | 0.179694129 | 0.095588441 |
| 331 | Parieto-occipital sulcus middle                                 | DefaultC         | 0.756567461 | 0.141943076 | 0.101496304 |
| 332 | Putamen anterior                                                | No network found | 0.739922193 | 0.259304117 | 0.000779101 |
| 333 | Cerebrospinal fluid (between middle frontal gyrus and skull LH) | DefaultB         | 0.556576981 | 0.031208853 | 0.132744493 |
| 334 | Precentral gyrus mid-superior LH                                | DorsAttnB        | 0.53766133  | 0.108982083 | 0.155153847 |
| 335 | Thalamus anterior                                               | No network found | 0.346978506 | 0.653000735 | 3.64705E-05 |
| 336 | Posterior cingulate cortex anterior                             | ContC            | 0.762422142 | 0.141883176 | 0.095691284 |
| 337 | Superior temporal gyrus posterior LH                            | TempPar          | 0.627108456 | 0.282363027 | 0.076883693 |
| 338 | Central sulcus middle                                           | SomMotB          | 0.417065087 | 0.537770249 | 0.045121355 |
| 339 | Cerebellum IX and cerebellar peduncle                           | No network found | 0.669424975 | 0.212713618 | 0.110176244 |

Table S1. Description of the 512 Regions of Interest as described by Yeo Dictionary Atlas.

|     |                                                                          |                  |             |             |             |
|-----|--------------------------------------------------------------------------|------------------|-------------|-------------|-------------|
| 340 | Calcarine sulcus anterior RH                                             | VisPeri          | 0.646388291 | 0.28864727  | 0.064967206 |
| 341 | Cerebellum VI medial                                                     | No network found | 0.559019828 | 0.438832636 | 0.002145806 |
| 342 | Cerebellum V superior                                                    | No network found | 0.742354547 | 0.009807345 | 0.247845137 |
| 343 | Collateral sulcus anterior                                               | LimbicA          | 0.697767924 | 0.262812217 | 0.038991971 |
| 344 | Cerebellar peduncles                                                     | DefaultC         | 0.534487121 | 0.167068863 | 0.298366888 |
| 345 | Cerebrospinal fluid (between middle frontal gyrus anterior and skull RH) | SalVentAttnB     | 0.386216208 | 0.015279036 | 0.132015848 |
| 346 | Cerebellum secondary fissure                                             | No network found | 0.829922898 | 0.127012657 | 0.04196113  |
| 347 | Superior occipital gyrus inferior RH                                     | DorsAttnA        | 0.580849031 | 0.328452387 | 0.089410529 |
| 348 | Central sulcus superior                                                  | SomMotA          | 0.419256136 | 0.42374453  | 0.136052831 |
| 349 | Inferior occipital gyrus anterior LH                                     | ContA            | 0.798337414 | 0.097871396 | 0.094985094 |
| 350 | Superior parietal lobule posterior                                       | DorsAttnA        | 0.538790145 | 0.102112893 | 0.197173149 |
| 351 | Superior temporal sulcus mid-posterior LH                                | TempPar          | 0.680886786 | 0.263919321 | 0.055195462 |
| 352 | Lateral occipital cortex anterior LH                                     | VisCent          | 0.570622966 | 0.39200645  | 0.037239125 |
| 353 | Planum polare inferior                                                   | SomMotB          | 0.637437102 | 0.097732737 | 0.264764024 |
| 354 | Paracingulate gyrus anterior LH                                          | DefaultA         | 0.648713963 | 0.252445099 | 0.098844917 |
| 355 | Paracingulate sulcus posterior                                           | SalVentAttnA     | 0.60825538  | 0.312893603 | 0.078839843 |
| 356 | Inferior frontal gyrus anterior LH                                       | ContB            | 0.622729559 | 0.096846151 | 0.118054598 |
| 357 | Angular sulcus inferior LH                                               | DefaultB         | 0.661949135 | 0.281876338 | 0.055868032 |
| 358 | Subparietal sulcus RH                                                    | DefaultA         | 0.662419714 | 0.285201967 | 0.052371275 |
| 359 | Circular sulcus of the insula anterior                                   | SalVentAttnB     | 0.745153517 | 0.174971311 | 0.079886766 |
| 360 | Middle temporal gyrus mid-anterior RH                                    | DefaultA         | 0.784772706 | 0.108999099 | 0.101518423 |
| 361 | Cerebrospinal fluid (between intraparietal sulcus and skull LH)          | ContA            | 0.462381659 | 0.040588146 | 0.141427011 |
| 362 | Precuneus posterior                                                      | ContC            | 0.615980827 | 0.058670969 | 0.284713963 |
| 363 | Inferior occipital gyrus posterior LH                                    | VisCent          | 0.66075639  | 0.179278278 | 0.139174253 |
| 364 | Lingual gyrus inferior                                                   | VisPeri          | 0.597455117 | 0.051943624 | 0.34976984  |
| 365 | Angular gyrus postero-inferior LH                                        | DefaultA         | 0.642689754 | 0.266688972 | 0.08093647  |
| 366 | Inferior frontal gyrus anterior RH                                       | SalVentAttnB     | 0.620740444 | 0.246733812 | 0.080758983 |
| 367 | Paracingulate sulcus mid-posterior                                       | SalVentAttnB     | 0.631012276 | 0.157790048 | 0.211119848 |
| 368 | Frontomarginal gyrus LH                                                  | ContB            | 0.53137224  | 0.419130684 | 0.045010716 |
| 369 | Middle occipital sulcus RH                                               | VisCent          | 0.516774831 | 0.451391568 | 0.031786488 |
| 370 | Inferior occipital gyrus RH                                              | VisCent          | 0.720701001 | 0.201357093 | 0.076619191 |
| 371 | Inferior frontal sulcus anterior RH                                      | ContB            | 0.456168221 | 0.519374468 | 0.021679191 |
| 372 | Postcentral sulcus inferior LH                                           | DorsAttnB        | 0.427870142 | 0.543308937 | 0.028716545 |
| 373 | Middle temporal gyrus postero-inferior LH                                | ContA            | 0.750597495 | 0.189869613 | 0.051308147 |

Table S1. Description of the 512 Regions of Interest as described by Yeo Dictionary Atlas.

|     |                                                                   |                  |             |             |             |
|-----|-------------------------------------------------------------------|------------------|-------------|-------------|-------------|
| 374 | Superior parietal sulcus superior                                 | DorsAttnB        | 0.477290243 | 0.400377704 | 0.114218323 |
| 375 | Cerebellum VI lateral RH                                          | No network found | 0.827936357 | 0.029926958 | 0.130263126 |
| 376 | Cerebellum V RH                                                   | No network found | 0.8067154   | 0.018473246 | 0.174373025 |
| 377 | Internal capsule middle LH                                        | No network found | 0.161609967 | 0.838081223 | 0.000324275 |
| 378 | Cingulate sulcus antero-inferior                                  | DefaultA         | 0.6850836   | 0.247569108 | 0.067349287 |
| 379 | Middle temporal gyrus middle anterior LH                          | DefaultB         | 0.570880028 | 0.400135098 | 0.028414868 |
| 380 | Cerebrospinal fluid (between central sulcus and skull LH)         | SomMotA          | 0.381759094 | 0.112889783 | 0.14845101  |
| 381 | Cerebellum VI                                                     | No network found | 0.33236301  | 0.667599608 | 5.05615E-05 |
| 382 | Cerebrospinal fluid (between central sulcus and skull RH)         | SalVentAttnA     | 0.503997465 | 0.062280663 | 0.154706753 |
| 383 | Corona radiata anterior LH                                        | No network found | 0.012738877 | 0.987111619 | 0.000155677 |
| 384 | Superior occipital sulcus superior RH                             | ContA            | 0.611188734 | 0.242836119 | 0.141088398 |
| 385 | Intermediate primus of Jensen LH                                  | ContB            | 0.592482924 | 0.293059224 | 0.105852296 |
| 386 | Lateral occipital cortex antero-superior LH                       | DorsAttnA        | 0.595836472 | 0.346464024 | 0.056838954 |
| 387 | Supramarginal gyrus inferior RH                                   | SalVentAttnA     | 0.694690408 | 0.137963822 | 0.111625261 |
| 388 | Insula antero-superior LH                                         | SalVentAttnB     | 0.566232171 | 0.40148635  | 0.032290211 |
| 389 | Callosomarginal sulcus mid-inferior                               | SomMotA          | 0.739794116 | 0.048184093 | 0.212028642 |
| 390 | Insula postero-inferior                                           | SomMotB          | 0.65878028  | 0.233787547 | 0.107449524 |
| 391 | Middle temporal gyrus middle RH                                   | DefaultB         | 0.749879807 | 0.170965735 | 0.07038133  |
| 392 | Retrosplenial cortex inferior                                     | DefaultC         | 0.25218644  | 0.002791469 | 0.74502343  |
| 393 | Suborbital sulcus                                                 | No network found | 0.060348741 | 0.938503025 | 0.001079245 |
| 394 | Cingulate sulcus anterior RH                                      | DefaultA         | 0.592935383 | 0.361656694 | 0.045422955 |
| 395 | Precuneus postero-superior                                        | ContC            | 0.597592143 | 0.259232538 | 0.118290578 |
| 396 | Superior longitudinal fasciculus I posterior                      | No network found | 0.037551508 | 0.96203527  | 0.000429463 |
| 397 | Middle frontal gyrus anterior lateral LH                          | SalVentAttnB     | 0.617441986 | 0.226190938 | 0.078022188 |
| 398 | Cerebrospinal fluid (between callosomarginal sulcus and skull RH) | DorsAttnB        | 0.465938521 | 0.091806148 | 0.197203754 |
| 399 | Angular sulcus superior RH                                        | ContB            | 0.654457535 | 0.255050754 | 0.072453444 |
| 400 | Collateral sulcus middle                                          | DefaultC         | 0.705735284 | 0.271804551 | 0.02247535  |
| 401 | Pars opercularis LH                                               | DefaultB         | 0.513648886 | 0.453584537 | 0.031206148 |
| 402 | Superior temporal gyrus middle LH                                 | TempPar          | 0.607989024 | 0.353509952 | 0.031382715 |
| 403 | Occipitotemporal sulcus posterior LH                              | DorsAttnA        | 0.532133842 | 0.449318252 | 0.018545828 |
| 404 | Cerebellum Crus I posterior                                       | No network found | 0.65387445  | 0.027150726 | 0.253631861 |
| 405 | Lateral fissure posterior limb RH                                 | SomMotB          | 0.717559914 | 0.094146473 | 0.168661628 |
| 406 | Caudate nucleus                                                   | No network found | 0.781939593 | 0.198546804 | 0.019521266 |
| 407 | Lateral ventricles posterior horns                                | No network found | 0.295096276 | 0.334489048 | 0.370429542 |

Table S1. Description of the 512 Regions of Interest as described by Yeo Dictionary Atlas.

|     |                                                           |                  |             |             |             |
|-----|-----------------------------------------------------------|------------------|-------------|-------------|-------------|
| 408 | Callosal sulcus mid-posterior                             | ContC            | 0.239608103 | 0.756429635 | 0.003971385 |
| 409 | Supramarginal gyrus antero-inferior LH                    | SalVentAttnA     | 0.734902223 | 0.148585591 | 0.113466496 |
| 410 | Callosomarginal sulcus superior                           | SomMotA          | 0.554547266 | 0.17647632  | 0.268946014 |
| 411 | Angular gyrus antero-inferior LH                          | TempPar          | 0.653302326 | 0.099318528 | 0.145732425 |
| 412 | Superior parts of central and postcentral sulci LH        | SomMotA          | 0.464630064 | 0.402063073 | 0.126691525 |
| 413 | Precuneus RH                                              | ContC            | 0.629216737 | 0.235625944 | 0.134070115 |
| 414 | Superior parts of central and postcentral sulci RH        | SomMotA          | 0.4020748   | 0.513207623 | 0.081574895 |
| 415 | Thalamus LH                                               | No network found | 0.3420807   | 0.656572569 | 0.001351311 |
| 416 | Angular gyrus postero-superior LH                         | DefaultC         | 0.605252844 | 0.218319472 | 0.111969623 |
| 417 | Paracentral lobule superior                               | SomMotA          | 0.551010112 | 0.204914422 | 0.24181066  |
| 418 | Angular gyrus posterior RH                                | DefaultC         | 0.691925659 | 0.216164505 | 0.082174833 |
| 419 | Calcarine sulcus posterior medial                         | VisPeri          | 0.664175455 | 0.209709227 | 0.124406599 |
| 420 | Paracingulate sulcus posterior LH                         | SalVentAttnA     | 0.619086874 | 0.126849569 | 0.251048069 |
| 421 | Thalamus medial                                           | No network found | 0.668320389 | 0.101603079 | 0.230073416 |
| 422 | Fusiform gyrus middle inferior RH                         | VisCent          | 0.829198368 | 0.068176169 | 0.102630526 |
| 423 | Caudate nucleus tail                                      | No network found | 0.416044065 | 0.15304269  | 0.430916502 |
| 424 | Parieto-occipital sulcus postero-inferior RH              | VisPeri          | 0.50916539  | 0.393844628 | 0.096770897 |
| 425 | Cerebellum Crus I superior                                | VisCent          | 0.733217352 | 0.033554848 | 0.226859016 |
| 426 | Temporal pole RH                                          | DefaultB         | 0.768033999 | 0.140726293 | 0.067907968 |
| 427 | Lingual gyrus anterior                                    | VisPeri          | 0.709260473 | 0.042417436 | 0.248332127 |
| 428 | Cerebrospinal fluid (between postcentral gyrus and skull) | SomMotA          | 0.259888853 | 0.068094751 | 0.084048754 |
| 429 | Cerebellum Crus II RH                                     | No network found | 0.744744197 | 0.222710955 | 0.032034283 |
| 430 | Corpus callosum anterior body                             | No network found | 0.165811343 | 0.444593939 | 0.389593453 |
| 431 | Superior occipital gyrus RH                               | VisCent          | 0.696967764 | 0.201243335 | 0.09086667  |
| 432 | Subparietal sulcus inferior LH                            | DefaultA         | 0.643890632 | 0.294685988 | 0.061419274 |
| 433 | Intraparietal sulcus mid-posterior RH                     | DorsAttnA        | 0.460455357 | 0.447256783 | 0.091765312 |
| 434 | Hippocampus posterior                                     | No network found | 0.296411789 | 0.271511513 | 0.432076677 |
| 435 | Cuneus anterior                                           | VisPeri          | 0.693141513 | 0.203611906 | 0.10323641  |
| 436 | Precuneus antero-superior                                 | DorsAttnB        | 0.607688617 | 0.137941025 | 0.252463421 |
| 437 | Central sulcus inferior                                   | SomMotB          | 0.544180606 | 0.389950198 | 0.06588618  |
| 438 | Central sulcus mid-inferior RH                            | SomMotB          | 0.510695489 | 0.411591127 | 0.077340008 |
| 439 | Precentral sulcus inferior RH                             | ContA            | 0.688999119 | 0.197358834 | 0.107619482 |
| 440 | Superior longitudinal fasciculus I                        | DorsAttnB        | 0.05312335  | 0.946630694 | 0.000249175 |
| 441 | Middle frontal gyrus anterior medial RH                   | SalVentAttnB     | 0.538547303 | 0.431870295 | 0.028998576 |

Table S1. Description of the 512 Regions of Interest as described by Yeo Dictionary Atlas.

|     |                                                                                |                  |             |             |             |
|-----|--------------------------------------------------------------------------------|------------------|-------------|-------------|-------------|
| 442 | Cerebellum Crus I posterior LH                                                 | No network found | 0.849412137 | 0.058036711 | 0.085389362 |
| 443 | Superior temporal sulcus middle LH                                             | TempPar          | 0.808436576 | 0.100397856 | 0.090620992 |
| 444 | Cerebrospinal fluid (between intraparietal sulcus and skull RH)                | ContB            | 0.605302742 | 0.071515579 | 0.147612006 |
| 445 | Forceps minor RH                                                               | ContB            | 0.078848799 | 0.920366519 | 0.000789332 |
| 446 | Forceps major                                                                  | No network found | 0.157852287 | 0.837706165 | 0.004437784 |
| 447 | Superior temporal sulcus middle-inferior RH                                    | TempPar          | 0.637254453 | 0.311489273 | 0.05123416  |
| 448 | Lingual gyrus mid-anterior LH                                                  | VisPeri          | 0.689534795 | 0.270938456 | 0.039544802 |
| 449 | Middle frontal gyrus mid-posterior lateral LH                                  | ContB            | 0.598892298 | 0.308317877 | 0.072132547 |
| 450 | Cerebellum superior posterior fissure LH                                       | No network found | 0.821439005 | 0.147359869 | 0.031011076 |
| 451 | Fusiform gyrus middle RH                                                       | VisCent          | 0.640199593 | 0.3259268   | 0.03387467  |
| 452 | Medulla oblongata superior                                                     | No network found | 0.527587287 | 0.35354841  | 0.118853926 |
| 453 | Superior occipital gyrus superior RH                                           | DorsAttnA        | 0.553118425 | 0.201439604 | 0.195756496 |
| 454 | Superior longitudinal fasciculus III posterior RH                              | No network found | 0.020325474 | 0.979554972 | 0.000129974 |
| 455 | Frontomarginal sulcus                                                          | LimbicB          | 0.606495088 | 0.316538491 | 0.05519162  |
| 456 | Superior longitudinal fasciculus III middle RH                                 | No network found | 0.093262295 | 0.889663132 | 0.017070125 |
| 457 | Inferior frontal sulcus mid-anterior LH                                        | ContA            | 0.638708337 | 0.253342899 | 0.079257396 |
| 458 | Cerebrospinal fluid (between superior frontal gyrus middle superior and skull) | DefaultB         | 0.492972394 | 0.021097743 | 0.14128735  |
| 459 | Central sulcus LH                                                              | SomMotB          | 0.570922966 | 0.334189912 | 0.084858147 |
| 460 | Intraparietal sulcus posterior RH                                              | DorsAttnA        | 0.475384986 | 0.450622762 | 0.070861131 |
| 461 | Precuneus inferior                                                             | DefaultA         | 0.740305407 | 0.100671615 | 0.159028368 |
| 462 | Heschl's gyrus RH                                                              | SomMotB          | 0.721826532 | 0.10110165  | 0.151891374 |
| 463 | Intraparietal sulcus posterior LH                                              | ContA            | 0.521556481 | 0.39708796  | 0.078642222 |
| 464 | Lateral ventricles anterior horns                                              | No network found | 0.295519085 | 0.02692429  | 0.677562317 |
| 465 | Cerebrospinal fluid (between postcentral sulcus and skull RH)                  | SomMotA          | 0.471512226 | 0.190942743 | 0.140548513 |
| 466 | Central sulcus superior LH                                                     | SomMotA          | 0.420234935 | 0.49210841  | 0.085594344 |
| 467 | External capsule middle LH                                                     | SalVentAttnA     | 0.739448773 | 0.249987937 | 0.010578426 |
| 468 | Putamen RH                                                                     | No network found | 0.501976765 | 0.497826724 | 0.000199584 |
| 469 | Cerebrospinal fluid (between superior parietal lobule posterior and skull RH)  | DorsAttnA        | 0.499255539 | 0.088511002 | 0.159335486 |
| 470 | Insula superior                                                                | SalVentAttnA     | 0.80171039  | 0.118674543 | 0.074126405 |
| 471 | Heschl's gyrus posterior RH                                                    | SomMotB          | 0.673933044 | 0.222210761 | 0.103847151 |
| 472 | Optic radiation RH                                                             | No network found | 0.045413111 | 0.953175947 | 0.001402132 |
| 473 | Anterior parts of occipitotemporal and collateral sulci LH                     | LimbicA          | 0.548879512 | 0.413961493 | 0.036462353 |
| 474 | Cingulate sulcus mid-posterior                                                 | SalVentAttnA     | 0.575068577 | 0.398911891 | 0.026023868 |
| 475 | Middle frontal sulcus mid-anterior LH                                          | SalVentAttnB     | 0.465215083 | 0.510977739 | 0.022272309 |

Table S1. Description of the 512 Regions of Interest as described by Yeo Dictionary Atlas.

|     |                                                                     |                  |             |             |             |
|-----|---------------------------------------------------------------------|------------------|-------------|-------------|-------------|
| 476 | Ventromedial prefrontal cortex posterior                            | LimbicB          | 0.654061239 | 0.276824702 | 0.069125901 |
| 477 | Cerebrospinal fluid (between superior parietal lobule and skull LH) | DorsAttnB        | 0.383078276 | 0.06775507  | 0.13907371  |
| 478 | Cerebellum VI posterior LH                                          | VisCent          | 0.870035355 | 0.041043692 | 0.08893963  |
| 479 | Ventromedial prefrontal cortex anterior                             | LimbicB          | 0.586667239 | 0.268300783 | 0.143981806 |
| 480 | Putamen postero-superior                                            | No network found | 0.526602683 | 0.473234967 | 0.000174243 |
| 481 | Cerebellum VI LH                                                    | No network found | 0.889806951 | 0.096225436 | 0.013976184 |
| 482 | Cerebellum Crus I superior RH                                       | No network found | 0.846046892 | 0.04144433  | 0.110223028 |
| 483 | Superior longitudinal fasciculus III anterior RH                    | No network found | 0.01178538  | 0.987998279 | 0.000214056 |
| 484 | Midbrain inferior                                                   | No network found | 0.579708897 | 0.381526466 | 0.038767644 |
| 485 | Postcentral gyrus middle RH                                         | DorsAttnB        | 0.434808411 | 0.05836386  | 0.21657899  |
| 486 | Paracingulate sulcus mid-posterior RH                               | ContB            | 0.545644231 | 0.387044639 | 0.066861598 |
| 487 | Fusiform gyrus posterior LH                                         | VisCent          | 0.558699849 | 0.412256164 | 0.029052176 |
| 488 | Hippocampus middle                                                  | No network found | 0.617027966 | 0.331789855 | 0.051197698 |
| 489 | Corpus callosum rostrum                                             | LimbicB          | 0.63860116  | 0.274693367 | 0.085747477 |
| 490 | Orbitofrontal cortex                                                | LimbicB          | 0.617487693 | 0.342877073 | 0.039377708 |
| 491 | Cerebellum Crus II medial RH                                        | No network found | 0.630457316 | 0.361532948 | 0.008016378 |
| 492 | Cerebellum IV superior                                              | No network found | 0.875831066 | 0.072096838 | 0.05205553  |
| 493 | Cingulate sulcus posterior LH                                       | SomMotA          | 0.688177236 | 0.257625095 | 0.054196739 |
| 494 | Superior parietal lobule superior                                   | DorsAttnB        | 0.581831956 | 0.232739876 | 0.17243137  |
| 495 | Lingual gyrus middle RH                                             | VisPeri          | 0.540080688 | 0.4364065   | 0.023518656 |
| 496 | Corpus callosum isthmus posterior                                   | ContC            | 0.058457628 | 0.941126294 | 0.000417149 |
| 497 | Precuneus superior                                                  | ContC            | 0.53262401  | 0.029299429 | 0.270372264 |
| 498 | Inferior occipital gyrus posterior RH                               | VisCent          | 0.63869787  | 0.292218296 | 0.065387677 |
| 499 | Callosomarginal sulcus inferior                                     | SalVentAttnA     | 0.602679428 | 0.356261625 | 0.041069823 |
| 500 | Superior frontal sulcus posterior RH                                | DorsAttnB        | 0.615499124 | 0.264516355 | 0.116286209 |
| 501 | Inferior fronto-occipital fasciculus posterior LH                   | No network found | 0.214325734 | 0.605483007 | 0.180191495 |
| 502 | Central sulcus mid-superior                                         | SomMotA          | 0.470216358 | 0.407373207 | 0.122328576 |
| 503 | Cerebrospinal fluid (between inferior frontal sulcus and skull LH)  | ContA            | 0.524210152 | 0.052491901 | 0.172495322 |
| 504 | Cerebellum Crus I anterior LH                                       | No network found | 0.681471888 | 0.304613043 | 0.013364418 |
| 505 | Central operculum anterior RH                                       | SomMotB          | 0.342846302 | 0.644569071 | 0.012590637 |
| 506 | Corpus callosum splenium                                            | No network found | 0.174880943 | 0.442820413 | 0.382315374 |
| 507 | Superior occipital sulcus RH                                        | DorsAttnA        | 0.494671495 | 0.458875999 | 0.046466755 |
| 508 | Superior temporal gyrus superior LH                                 | SomMotB          | 0.73042931  | 0.046016168 | 0.178493726 |
| 509 | Middle temporal gyrus mid-posterior LH                              | TempPar          | 0.691444654 | 0.205172354 | 0.078883626 |

Table S1. Description of the 512 Regions of Interest as described by Yeo Dictionary Atlas.

|     |                                    |              |             |             |             |
|-----|------------------------------------|--------------|-------------|-------------|-------------|
| 510 | Insula postero-inferior RH         | SalVentAttnA | 0.8388826   | 0.139671923 | 0.021460774 |
| 511 | Parieto-occipital sulcus middle LH | ContC        | 0.742030125 | 0.087003424 | 0.170947909 |
| 512 | Precentral sulcus superior RH      | DorsAttnB    | 0.622743322 | 0.314314771 | 0.062787499 |
